# Supplementary material for: pH-Responsive nanoprobes for tumour fluorescence imaging based on spirolactam rhodamine
Source: Royal Society of Chemistry journal article supplement (doi:10.1039/d2qm00406b), 2022-01-01
Supplement: d2qm00406b1.pdf [file d2qm00406b1.pdf]

## Supporting Information

### **A pH responsive nanoprobe for tumor fluorescence imaging based on spiro lactam rhodamine**

**Weizhou Sha, Mingzhu Wang, Wei Wang\* and Zhi Yuan\***

*Key Laboratory of Functional Polymer Materials of the Ministry of  
Education, Institute of Polymer Chemistry, College of Chemistry, Nankai  
University, Tianjin 300071, China*

Corresponding Authors:

Wei Wang

Email: [duroo@nankai.edu.cn](mailto:duroo@nankai.edu.cn)

Zhi Yuan

E-mail: [zhiy@nankai.edu.cn](mailto:zhiy@nankai.edu.cn)

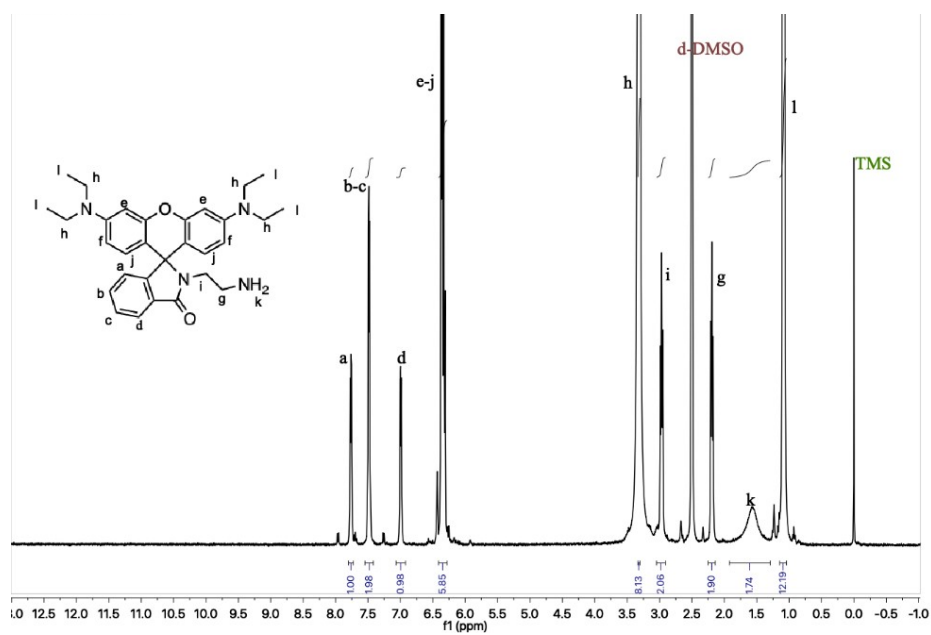

Figure S1.  $^1\text{H-NMR}$  of RdB-EDS.

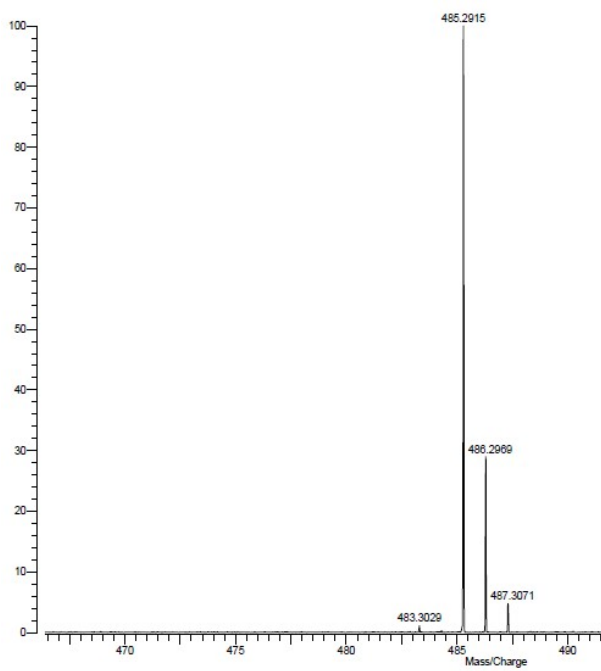

Figure S2. ESI-MS of RdB-EDS.

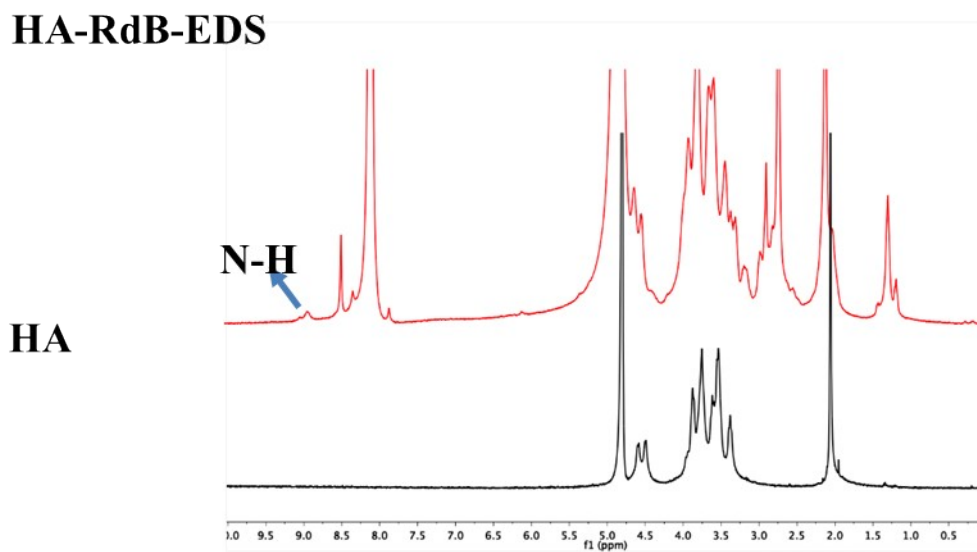

**Figure S3.** <sup>1</sup>H-NMR of HA-RdB-EDS.

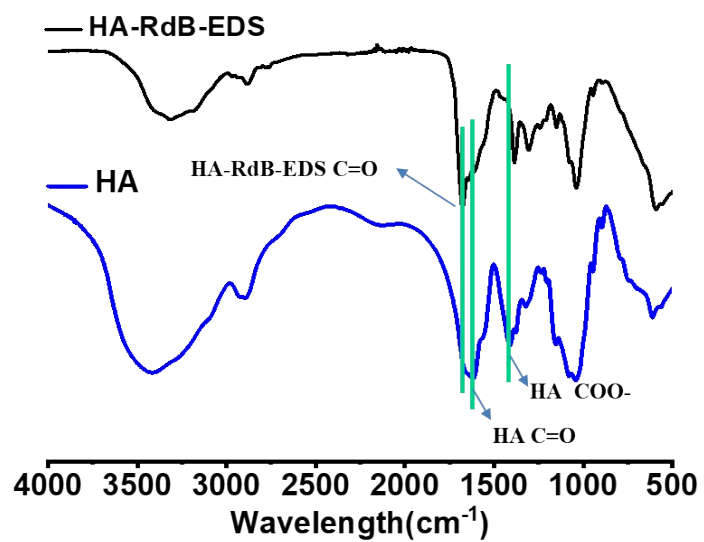

**Figure S4** FT-IR HA-RdB-EDS.

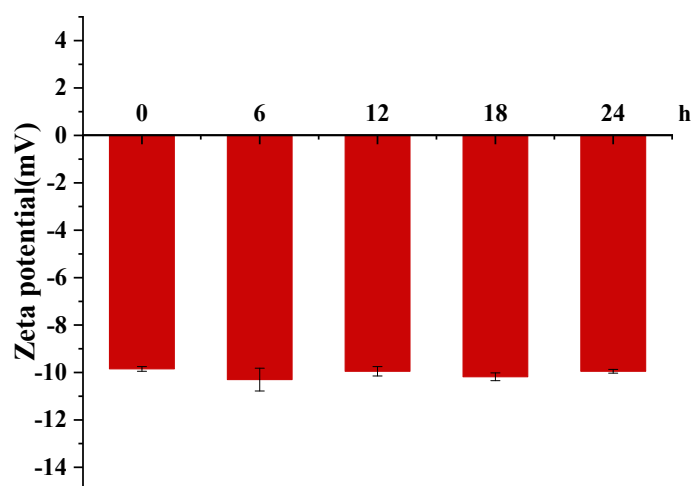

**Figure S5** Zeta potential of HA-RdB-EDS NPs.

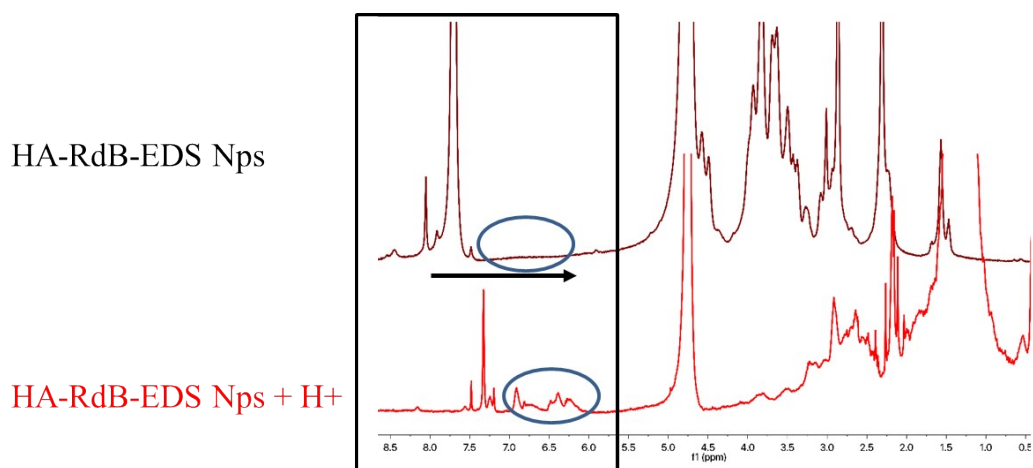

**Figure S6**  $^1\text{H-NMR}$  of HA-RdB-EDS NPs with or without  $\text{H}^+$ .

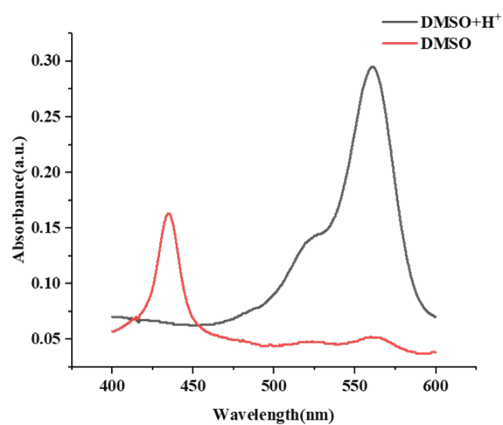

**Figure S7**  $^1\text{H-NMR}$  of HA-RdB-EDS NPs with or without  $\text{H}^+$ .

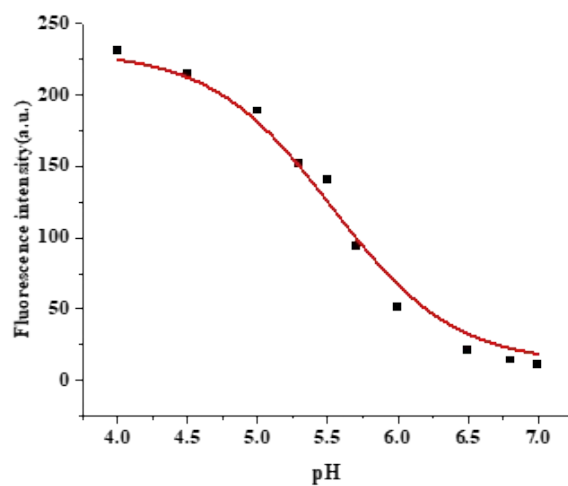

**Figure S8** The fluorescence intensity of the HA-RdB-EDS NPs (2 mg/mL) at 586 nm in PBS buffer at different pH values

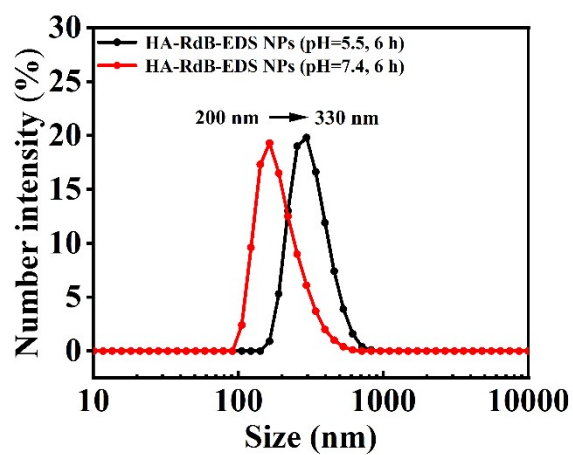

**FigureS9.** The hydrodynamic diameters of HA-RdB-EDS NPs in PBS of different pH value.
